# Supplementary material for: Rhenium Corrole Dimers: Electrochemical Insights into the Nature of the Metal–Metal Quadruple Bond
Source: PubMed Central journal article supplement (PMC8278387; doi:10.1021/acs.inorgchem.1c00986), 2021-05-17
Supplement: ic1c00986_si_001.pdf [file ic1c00986_si_001.pdf]

## Supporting Information

# Rhenium Corrole Dimers: Electrochemical Insights into the Nature of the Metal-Metal Quadruple Bond

Abraham B. Alemayehu,<sup>a</sup> Laura J. M<sup>c</sup>Cormick-M<sup>c</sup>Pherson,<sup>b</sup> Jeanet Conradie,<sup>a,c</sup> and Abhik Ghosh<sup>\*,a</sup>

<sup>a</sup> Department of Chemistry, UiT – The Arctic University of Norway, N-9037 Tromsø, Norway;

Email: abhik.ghosh@uit.no; Telephone: +47 45476145

<sup>b</sup>Advanced Light Source, Lawrence Berkeley National Laboratory, Berkeley, CA 94720-8229, USA

<sup>c</sup>Department of Chemistry, University of the Free State, P.O. Box 339, Bloemfontein 9300, Republic of South Africa.

| <b>Contents</b>                    | <b>Page</b> |
|------------------------------------|-------------|
| A. Additional spectroscopic data   | S2          |
| B. Optimized Cartesian coordinates | S5          |

## A. Additional spectroscopic data

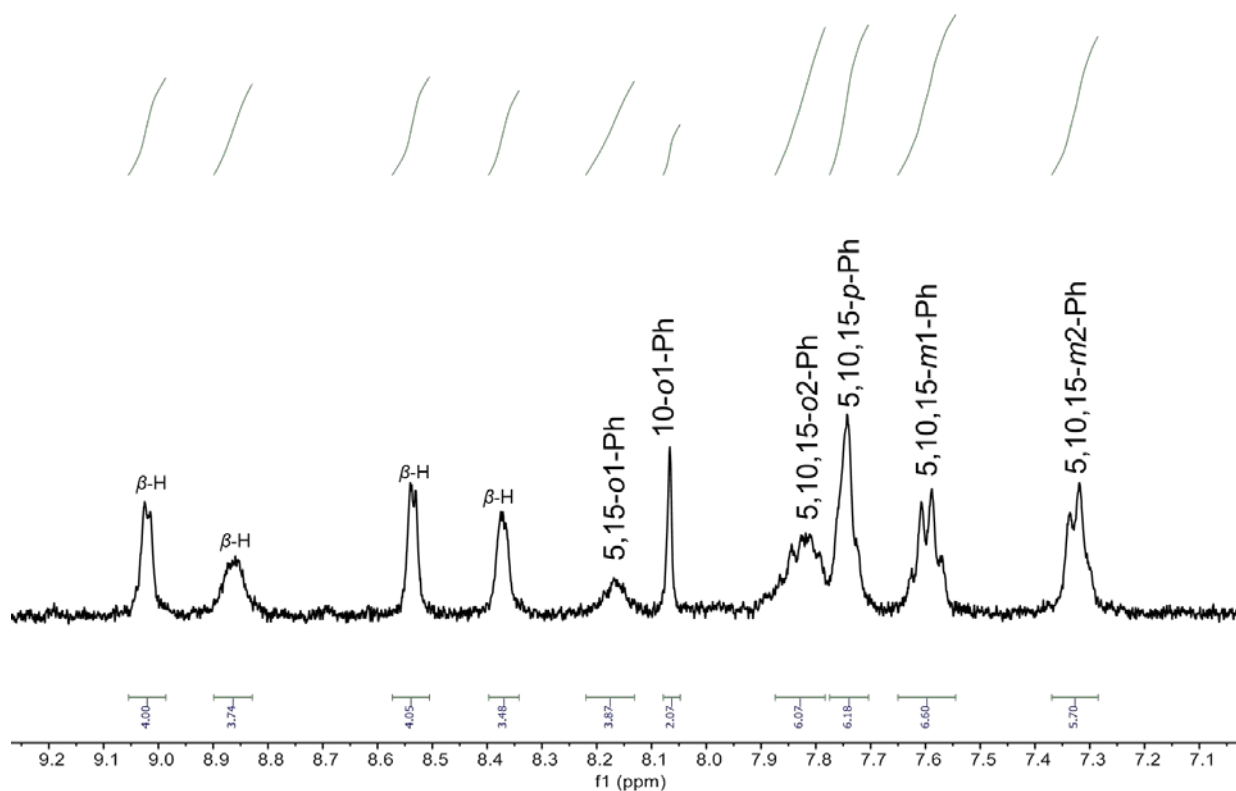

**Figure S1.**  $^1\text{H}$  NMR spectrum of  $\{\text{Re}[\text{TPC}]\}_2$  in THF at 298 K.

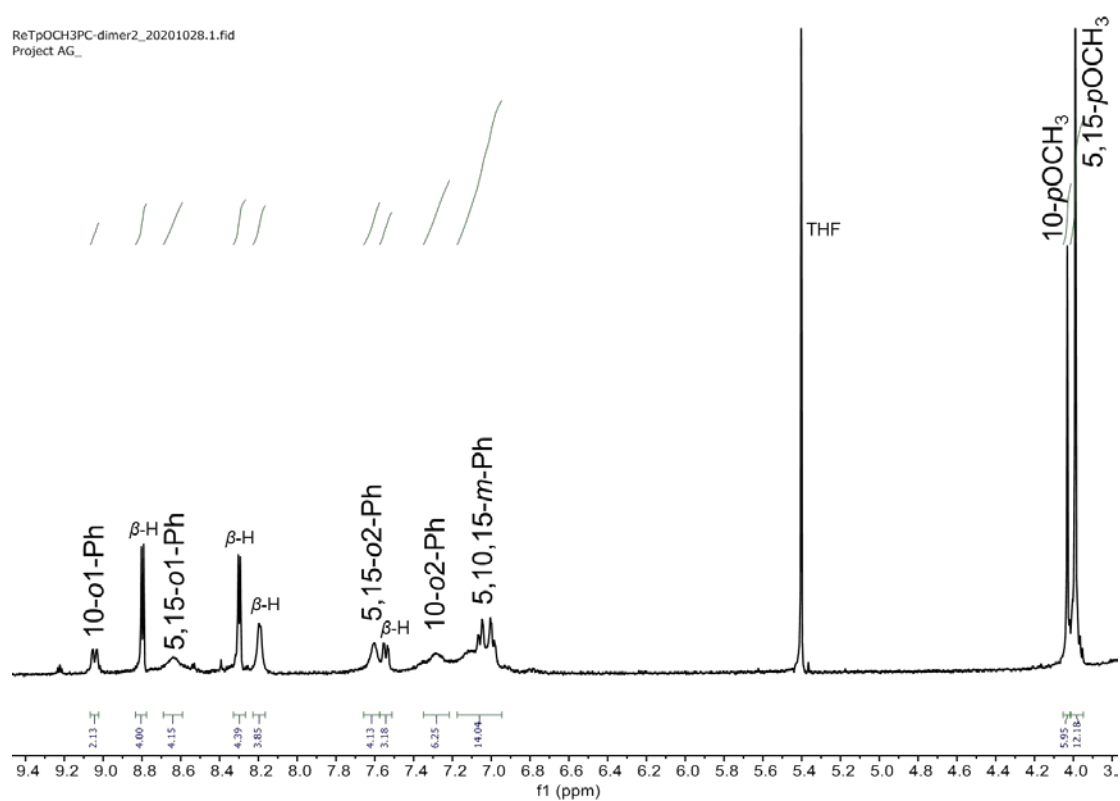

**Figure S2.**  $^1\text{H}$  NMR spectrum of  $\{\text{Re}[\text{TpOMePC}]\}_2$  in THF at 298 K.

(ReTPC)2\_201023153138 #1-5 RT: 0.02-0.13 AV: 5 NL: 1.33E7  
T: FTMS + c ESI Full ms [190.00-2000.00]

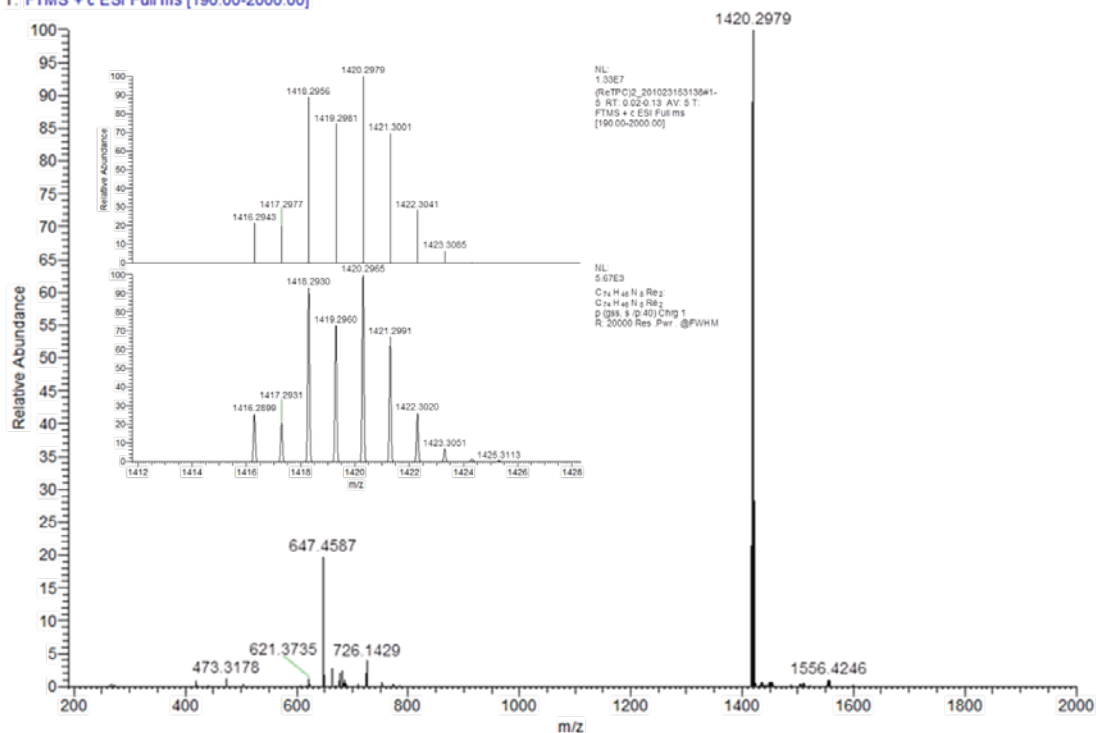

**Figure S3.** Postive-mode ESI-MS of {Re[TPC]}<sub>2</sub>. Inset: isotope pattern for molecular ion – experimental (top) and simulation (bottom).

(ReTpCH3PC)2\_201023153138 #1-5 RT: 0.00-0.11 AV: 5 NL: 1.78E7  
T: FTMS + c ESI Full ms [190.00-2000.00]

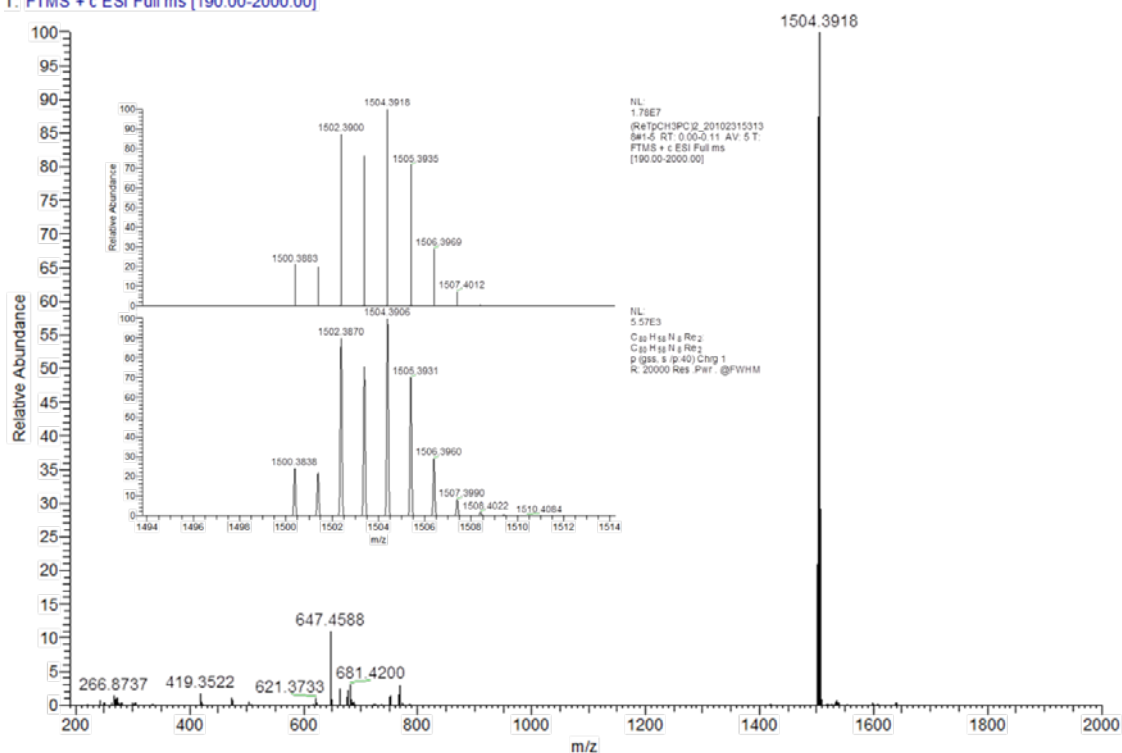

**Figure S4.** Postive-mode ESI-MS of {Re[TpMePC]}<sub>2</sub>. Inset: isotope pattern for molecular ion – experimental (top) and simulation (bottom).

(ReTpOCH3PC)<sub>2</sub>\_201023153138 #1-2 RT: 0.01-0.03 AV: 2 NL: 1.00E7  
T: FTMS + c ESI Full ms [190.00-2000.00]

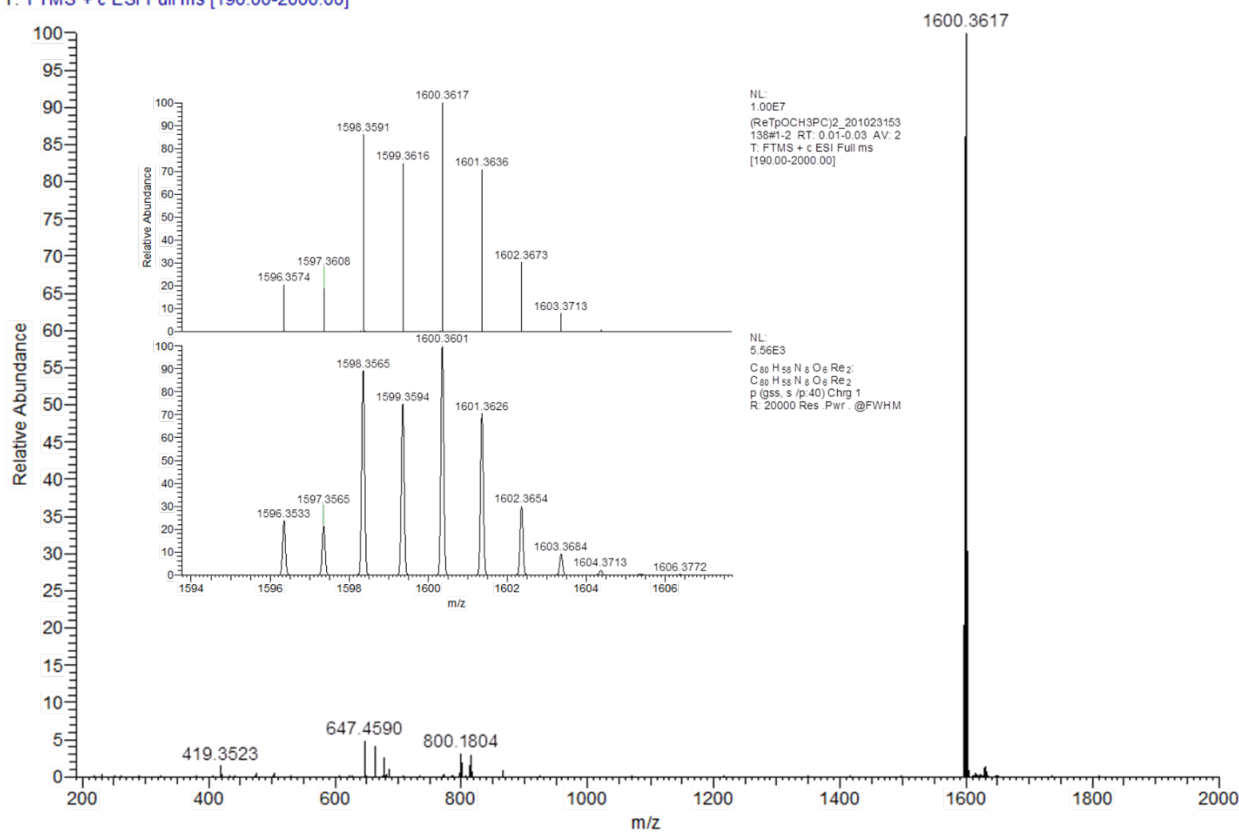

**Figure S5.** Postive-mode ESI-MS of {Re[*TP*OMePC]}<sub>2</sub>. Inset: isotope pattern for molecular ion – experimental (top) and simulation (bottom).

## B. Optimized OLYP/ZORA-STO-TZ2P Cartesian coordinates (Å)

{Re[Cor]}<sub>2</sub>; S = 0; C<sub>2h</sub> symmetry constraint

|   |              |              |              |
|---|--------------|--------------|--------------|
| C | 0.154028000  | 2.038259000  | 2.819067000  |
| C | 0.154028000  | 2.038259000  | -2.819067000 |
| C | 0.762458000  | -2.908675000 | 3.492654000  |
| C | 0.762458000  | -2.908675000 | -3.492654000 |
| C | 1.199152000  | -2.999179000 | 1.260095000  |
| C | 1.199152000  | -2.999179000 | -1.260095000 |
| C | 1.262711000  | 1.362343000  | 3.346543000  |
| C | 1.262711000  | 1.362343000  | -3.346543000 |
| C | 1.581296000  | -3.490269000 | 2.550995000  |
| C | 1.581296000  | -3.490269000 | -2.550995000 |
| C | 1.685140000  | -3.377085000 | 0.000000000  |
| C | 2.253206000  | 0.699184000  | 2.602999000  |
| C | 2.253206000  | 0.699184000  | -2.602999000 |
| C | 3.344930000  | 0.077801000  | 0.711884000  |
| C | 3.344930000  | 0.077801000  | -0.711884000 |
| C | 3.550087000  | 0.215549000  | 2.966923000  |
| C | 3.550087000  | 0.215549000  | -2.966923000 |
| C | 4.221306000  | -0.152388000 | 1.803630000  |
| C | 4.221306000  | -0.152388000 | -1.803630000 |
| C | -0.154028000 | -2.038259000 | 2.819067000  |
| C | -0.154028000 | -2.038259000 | -2.819067000 |
| C | -0.762458000 | 2.908675000  | 3.492654000  |
| C | -0.762458000 | 2.908675000  | -3.492654000 |
| C | -1.199152000 | 2.999179000  | 1.260095000  |
| C | -1.199152000 | 2.999179000  | -1.260095000 |
| C | -1.262711000 | -1.362343000 | 3.346543000  |
| C | -1.262711000 | -1.362343000 | -3.346543000 |
| C | -1.581296000 | 3.490269000  | 2.550995000  |
| C | -1.581296000 | 3.490269000  | -2.550995000 |
| C | -1.685140000 | 3.377085000  | 0.000000000  |
| C | -2.253206000 | -0.699184000 | 2.602999000  |
| C | -2.253206000 | -0.699184000 | -2.602999000 |
| C | -3.344930000 | -0.077801000 | 0.711884000  |
| C | -3.344930000 | -0.077801000 | -0.711884000 |
| C | -3.550087000 | -0.215549000 | 2.966923000  |
| C | -3.550087000 | -0.215549000 | -2.966923000 |
| C | -4.221306000 | 0.152388000  | 1.803630000  |
| C | -4.221306000 | 0.152388000  | -1.803630000 |
| H | 0.761301000  | -3.089816000 | 4.560296000  |
| H | 0.761301000  | -3.089816000 | -4.560296000 |
| H | 1.415609000  | 1.443863000  | 4.418854000  |
| H | 1.415609000  | 1.443863000  | -4.418854000 |
| H | 2.364583000  | -4.218086000 | 2.720775000  |
| H | 2.364583000  | -4.218086000 | -2.720775000 |
| H | 2.496785000  | -4.098852000 | 0.000000000  |
| H | 3.940944000  | 0.186784000  | 3.976036000  |

|    |              |              |              |
|----|--------------|--------------|--------------|
| H  | 3.940944000  | 0.186784000  | -3.976036000 |
| H  | 5.236873000  | -0.520179000 | 1.732769000  |
| H  | 5.236873000  | -0.520179000 | -1.732769000 |
| H  | -0.761301000 | 3.089816000  | 4.560296000  |
| H  | -0.761301000 | 3.089816000  | -4.560296000 |
| H  | -1.415609000 | -1.443863000 | 4.418854000  |
| H  | -1.415609000 | -1.443863000 | -4.418854000 |
| H  | -2.364583000 | 4.218086000  | 2.720775000  |
| H  | -2.364583000 | 4.218086000  | -2.720775000 |
| H  | -2.496785000 | 4.098852000  | 0.000000000  |
| H  | -3.940944000 | -0.186784000 | 3.976036000  |
| H  | -3.940944000 | -0.186784000 | -3.976036000 |
| H  | -5.236873000 | 0.520179000  | 1.732769000  |
| H  | -5.236873000 | 0.520179000  | -1.732769000 |
| N  | 0.165249000  | -2.085437000 | 1.462155000  |
| N  | 0.165249000  | -2.085437000 | -1.462155000 |
| N  | 2.154012000  | 0.553479000  | 1.235284000  |
| N  | 2.154012000  | 0.553479000  | -1.235284000 |
| N  | -0.165249000 | 2.085437000  | 1.462155000  |
| N  | -0.165249000 | 2.085437000  | -1.462155000 |
| N  | -2.154012000 | -0.553479000 | 1.235284000  |
| N  | -2.154012000 | -0.553479000 | -1.235284000 |
| Re | 0.590273000  | 0.927732000  | 0.000000000  |
| Re | -0.590273000 | -0.927732000 | 0.000000000  |

**{Re[Cor]}<sub>2</sub>; S = 1; C<sub>2</sub> symmetry constraint**

|   |              |              |              |
|---|--------------|--------------|--------------|
| C | 0.153073000  | 1.824906000  | 2.982548000  |
| C | 0.300636000  | 1.832102000  | -2.983901000 |
| C | 0.830148000  | -2.392807000 | 3.854383000  |
| C | 1.039792000  | -2.243082000 | -2.954300000 |
| C | 1.205449000  | 1.820514000  | -4.095035000 |
| C | 1.497457000  | 1.469322000  | 3.188159000  |
| C | 1.669163000  | -2.389007000 | 1.745885000  |
| C | 1.822986000  | -2.422787000 | -1.800335000 |
| C | 1.939551000  | -2.748427000 | 3.091676000  |
| C | 2.208992000  | -2.552402000 | 0.438363000  |
| C | 2.375918000  | 1.289697000  | -2.216063000 |
| C | 2.434048000  | 1.177084000  | 2.186586000  |
| C | 2.460072000  | 1.493424000  | -3.631797000 |
| C | 3.079145000  | -3.075461000 | -1.591500000 |
| C | 3.307304000  | -3.161245000 | -0.219773000 |
| C | 3.330419000  | 0.990342000  | 0.098132000  |
| C | 3.409772000  | 1.033822000  | -1.302136000 |
| C | 3.847252000  | 0.984696000  | 2.315346000  |
| C | 4.389907000  | 0.873573000  | 1.054242000  |
| C | -0.153073000 | -1.824906000 | 2.982548000  |
| C | -0.300636000 | -1.832102000 | -2.983901000 |
| C | -0.830148000 | 2.392807000  | 3.854383000  |
| C | -1.039792000 | 2.243082000  | -2.954300000 |

|    |              |              |              |
|----|--------------|--------------|--------------|
| C  | -1.205449000 | -1.820514000 | -4.095035000 |
| C  | -1.497457000 | -1.469322000 | 3.188159000  |
| C  | -1.669163000 | 2.389007000  | 1.745885000  |
| C  | -1.822986000 | 2.422787000  | -1.800335000 |
| C  | -1.939551000 | 2.748427000  | 3.091676000  |
| C  | -2.208992000 | 2.552402000  | 0.438363000  |
| C  | -2.375918000 | -1.289697000 | -2.216063000 |
| C  | -2.434048000 | -1.177084000 | 2.186586000  |
| C  | -2.460072000 | -1.493424000 | -3.631797000 |
| C  | -3.079145000 | 3.075461000  | -1.591500000 |
| C  | -3.307304000 | 3.161245000  | -0.219773000 |
| C  | -3.330419000 | -0.990342000 | 0.098132000  |
| C  | -3.409772000 | -1.033822000 | -1.302136000 |
| C  | -3.847252000 | -0.984696000 | 2.315346000  |
| C  | -4.389907000 | -0.873573000 | 1.054242000  |
| H  | 0.697450000  | -2.556215000 | 4.916448000  |
| H  | 0.928332000  | 2.070038000  | -5.111705000 |
| H  | 1.479045000  | -2.531313000 | -3.904810000 |
| H  | 1.872446000  | 1.500655000  | 4.206890000  |
| H  | 2.836018000  | -3.239909000 | 3.446926000  |
| H  | 3.375003000  | 1.425143000  | -4.206938000 |
| H  | 3.710597000  | -3.471902000 | -2.376699000 |
| H  | 4.150379000  | -3.636380000 | 0.264995000  |
| H  | 4.377803000  | 0.967673000  | 3.259167000  |
| H  | 4.402003000  | 0.911723000  | -1.726693000 |
| H  | 5.434132000  | 0.745519000  | 0.797998000  |
| H  | -0.697450000 | 2.556215000  | 4.916448000  |
| H  | -0.928332000 | -2.070038000 | -5.111705000 |
| H  | -1.479045000 | 2.531313000  | -3.904810000 |
| H  | -1.872446000 | -1.500655000 | 4.206890000  |
| H  | -2.836018000 | 3.239909000  | 3.446926000  |
| H  | -3.375003000 | -1.425143000 | -4.206938000 |
| H  | -3.710597000 | 3.471902000  | -2.376699000 |
| H  | -4.150379000 | 3.636380000  | 0.264995000  |
| H  | -4.377803000 | -0.967673000 | 3.259167000  |
| H  | -4.402003000 | -0.911723000 | -1.726693000 |
| H  | -5.434132000 | -0.745519000 | 0.797998000  |
| N  | 0.413626000  | -1.798254000 | 1.725495000  |
| N  | 1.040103000  | 1.467151000  | -1.857679000 |
| N  | 1.351525000  | -2.081729000 | -0.548862000 |
| N  | 2.145129000  | 1.137595000  | 0.819662000  |
| N  | -0.413626000 | 1.798254000  | 1.725495000  |
| N  | -1.040103000 | -1.467151000 | -1.857679000 |
| N  | -1.351525000 | 2.081729000  | -0.548862000 |
| N  | -2.145129000 | -1.137595000 | 0.819662000  |
| Re | 0.318090000  | 1.076279000  | -0.016374000 |
| Re | -0.318090000 | -1.076279000 | -0.016374000 |

**{Re[Cor]}<sub>2</sub> cation; S = ½; C<sub>2</sub> symmetry constraint**

|   |              |              |              |
|---|--------------|--------------|--------------|
| C | 0.067058000  | 1.883586000  | 2.975748000  |
| C | 0.379821000  | 1.763498000  | -2.986328000 |
| C | 0.937983000  | -2.479995000 | 3.808961000  |
| C | 0.967064000  | -2.183502000 | -2.997859000 |
| C | 1.305341000  | 1.719212000  | -4.075289000 |
| C | 1.401444000  | 1.538714000  | 3.221854000  |
| C | 1.713449000  | -2.427386000 | 1.679784000  |
| C | 1.779250000  | -2.387215000 | -1.874056000 |
| C | 2.021310000  | -2.824959000 | 3.007871000  |
| C | 2.221207000  | -2.567016000 | 0.345291000  |
| C | 2.373942000  | 1.225164000  | 2.246133000  |
| C | 2.425587000  | 1.224984000  | -2.157716000 |
| C | 2.548555000  | 1.391411000  | -3.572828000 |
| C | 3.036516000  | -3.054292000 | -1.713292000 |
| C | 3.298331000  | -3.172832000 | -0.350682000 |
| C | 3.324251000  | 0.986242000  | 0.194580000  |
| C | 3.435290000  | 0.989607000  | -1.206406000 |
| C | 3.781687000  | 1.050775000  | 2.422966000  |
| C | 4.359835000  | 0.906623000  | 1.177736000  |
| C | -0.067058000 | -1.883586000 | 2.975748000  |
| C | -0.379821000 | -1.763498000 | -2.986328000 |
| C | -0.937983000 | 2.479995000  | 3.808961000  |
| C | -0.967064000 | 2.183502000  | -2.997859000 |
| C | -1.305341000 | -1.719212000 | -4.075289000 |
| C | -1.401444000 | -1.538714000 | 3.221854000  |
| C | -1.713449000 | 2.427386000  | 1.679784000  |
| C | -1.779250000 | 2.387215000  | -1.874056000 |
| C | -2.021310000 | 2.824959000  | 3.007871000  |
| C | -2.221207000 | 2.567016000  | 0.345291000  |
| C | -2.373942000 | -1.225164000 | 2.246133000  |
| C | -2.425587000 | -1.224984000 | -2.157716000 |
| C | -2.548555000 | -1.391411000 | -3.572828000 |
| C | -3.036516000 | 3.054292000  | -1.713292000 |
| C | -3.298331000 | 3.172832000  | -0.350682000 |
| C | -3.324251000 | -0.986242000 | 0.194580000  |
| C | -3.435290000 | -0.989607000 | -1.206406000 |
| C | -3.781687000 | -1.050775000 | 2.422966000  |
| C | -4.359835000 | -0.906623000 | 1.177736000  |
| H | 0.831611000  | -2.672957000 | 4.868878000  |
| H | 1.057105000  | 1.951419000  | -5.103001000 |
| H | 1.376789000  | -2.459412000 | -3.965143000 |
| H | 1.754327000  | 1.606035000  | 4.246912000  |
| H | 2.921521000  | -3.334793000 | 3.324621000  |
| H | 3.476858000  | 1.309489000  | -4.123587000 |
| H | 3.640959000  | -3.442978000 | -2.522692000 |
| H | 4.146522000  | -3.669153000 | 0.102208000  |
| H | 4.288263000  | 1.071729000  | 3.379388000  |
| H | 4.438675000  | 0.860838000  | -1.602294000 |
| H | 5.412349000  | 0.786904000  | 0.954803000  |



|    |              |              |              |
|----|--------------|--------------|--------------|
| H  | -0.831611000 | 2.672957000  | 4.868878000  |
| H  | -1.057105000 | -1.951419000 | -5.103001000 |
| H  | -1.376789000 | 2.459412000  | -3.965143000 |
| H  | -1.754327000 | -1.606035000 | 4.246912000  |
| H  | -2.921521000 | 3.334793000  | 3.324621000  |
| H  | -3.476858000 | -1.309489000 | -4.123587000 |
| H  | -3.640959000 | 3.442978000  | -2.522692000 |
| H  | -4.146522000 | 3.669153000  | 0.102208000  |
| H  | -4.288263000 | -1.071729000 | 3.379388000  |
| H  | -4.438675000 | -0.860838000 | -1.602294000 |
| H  | -5.412349000 | -0.786904000 | 0.954803000  |
| N  | 0.467919000  | -1.829477000 | 1.702424000  |
| N  | 1.083638000  | 1.423321000  | -1.834987000 |
| N  | 1.342165000  | -2.069843000 | -0.600550000 |
| N  | 2.118989000  | 1.149448000  | 0.879581000  |
| N  | -0.467919000 | 1.829477000  | 1.702424000  |
| N  | -1.083638000 | -1.423321000 | -1.834987000 |
| N  | -1.342165000 | 2.069843000  | -0.600550000 |
| N  | -2.118989000 | -1.149448000 | 0.879581000  |
| Re | 0.313491000  | 1.075686000  | -0.004727000 |
| Re | -0.313491000 | -1.075686000 | -0.004727000 |

**{Re[Cor]}<sub>2</sub> anion;  $S = \frac{1}{2}$ ;  $C_2$  symmetry constraint**

|   |              |              |              |
|---|--------------|--------------|--------------|
| C | 0.150483000  | 1.926117000  | -3.333669000 |
| C | 0.194194000  | 1.898644000  | 3.328984000  |
| C | 0.980596000  | -2.188206000 | 2.608097000  |
| C | 1.015556000  | -2.207908000 | -2.595793000 |
| C | 1.389796000  | 1.527666000  | -2.808469000 |
| C | 1.426468000  | 1.503814000  | 2.784882000  |
| C | 2.181323000  | -2.875264000 | 2.980173000  |
| C | 2.190662000  | -2.566727000 | 0.729756000  |
| C | 2.200775000  | -2.570874000 | -0.698804000 |
| C | 2.219417000  | -2.901411000 | -2.946130000 |
| C | 2.641035000  | 1.408017000  | -3.503767000 |
| C | 2.686436000  | 1.375584000  | 3.462853000  |
| C | 2.916091000  | -3.117134000 | 1.819729000  |
| C | 2.939356000  | -3.132671000 | -1.774185000 |
| C | 3.004229000  | 1.072392000  | -1.284033000 |
| C | 3.020405000  | 1.059927000  | 1.235426000  |
| C | 3.619187000  | 0.931064000  | -0.028798000 |
| C | 3.622442000  | 1.128089000  | -2.580026000 |
| C | 3.655345000  | 1.103182000  | 2.523776000  |
| C | -0.150483000 | -1.926117000 | -3.333669000 |
| C | -0.194194000 | -1.898644000 | 3.328984000  |
| C | -0.980596000 | 2.188206000  | 2.608097000  |
| C | -1.015556000 | 2.207908000  | -2.595793000 |
| C | -1.389796000 | -1.527666000 | -2.808469000 |
| C | -1.426468000 | -1.503814000 | 2.784882000  |
| C | -2.181323000 | 2.875264000  | 2.980173000  |
| C | -2.190662000 | 2.566727000  | 0.729756000  |

|    |              |              |              |
|----|--------------|--------------|--------------|
| C  | -2.200775000 | 2.570874000  | -0.698804000 |
| C  | -2.219417000 | 2.901411000  | -2.946130000 |
| C  | -2.641035000 | -1.408017000 | -3.503767000 |
| C  | -2.686436000 | -1.375584000 | 3.462853000  |
| C  | -2.916091000 | 3.117134000  | 1.819729000  |
| C  | -2.939356000 | 3.132671000  | -1.774185000 |
| C  | -3.004229000 | -1.072392000 | -1.284033000 |
| C  | -3.020405000 | -1.059927000 | 1.235426000  |
| C  | -3.619187000 | -0.931064000 | -0.028798000 |
| C  | -3.622442000 | -1.128089000 | -2.580026000 |
| C  | -3.655345000 | -1.103182000 | 2.523776000  |
| H  | 0.121080000  | 2.119621000  | -4.403131000 |
| H  | 0.177690000  | 2.081192000  | 4.400629000  |
| H  | 2.438896000  | -3.186762000 | 3.985497000  |
| H  | 2.488208000  | -3.224183000 | -3.944852000 |
| H  | 2.765048000  | 1.545767000  | -4.571602000 |
| H  | 2.824451000  | 1.502378000  | 4.530342000  |
| H  | 3.856520000  | -3.650756000 | 1.751075000  |
| H  | 3.877103000  | -3.668497000 | -1.688088000 |
| H  | 4.681318000  | 0.992492000  | -2.765352000 |
| H  | 4.694327000  | 0.771582000  | -0.036384000 |
| H  | 4.716341000  | 0.964414000  | 2.694041000  |
| H  | -0.121080000 | -2.119621000 | -4.403131000 |
| H  | -0.177690000 | -2.081192000 | 4.400629000  |
| H  | -2.438896000 | 3.186762000  | 3.985497000  |
| H  | -2.488208000 | 3.224183000  | -3.944852000 |
| H  | -2.765048000 | -1.545767000 | -4.571602000 |
| H  | -2.824451000 | -1.502378000 | 4.530342000  |
| H  | -3.856520000 | 3.650756000  | 1.751075000  |
| H  | -3.877103000 | 3.668497000  | -1.688088000 |
| H  | -4.681318000 | -0.992492000 | -2.765352000 |
| H  | -4.694327000 | -0.771582000 | -0.036384000 |
| H  | -4.716341000 | -0.964414000 | 2.694041000  |
| N  | 1.054284000  | -1.972880000 | 1.252446000  |
| N  | 1.072442000  | -1.979291000 | -1.241609000 |
| N  | 1.646732000  | 1.278841000  | -1.462558000 |
| N  | 1.665688000  | 1.267053000  | 1.433497000  |
| N  | -1.054284000 | 1.972880000  | 1.252446000  |
| N  | -1.072442000 | 1.979291000  | -1.241609000 |
| N  | -1.646732000 | -1.278841000 | -1.462558000 |
| N  | -1.665688000 | -1.267053000 | 1.433497000  |
| Re | 0.250376000  | 1.078600000  | -0.005652000 |
| Re | -0.250376000 | -1.078600000 | -0.005652000 |
